# Supplementary material for: Superparamagnetic Iron Oxide Nanoparticles Reprogram the Tumor Microenvironment and Reduce Lung Cancer Regrowth after Crizotinib Treatment
Source: PubMed Central journal article supplement — ACS Nano. 2024 Apr 16;18(17):11025–41. doi: 10.1021/acsnano.3c08335 (PMC11064219; doi:10.1021/acsnano.3c08335), 2024-04-16
Supplement: nn3c08335_si_001.pdf [file nn3c08335_si_001.pdf]

1 *Superparamagnetic Iron Oxide Nanoparticles reprogram the tumor*  
2 *microenvironment and reduce lung cancer regrowth after crizotinib*  
3 *treatment*

4 *Supporting Information*  
5

6 Natalie K. Horvat<sup>1,2,4\*</sup>, Sara Chocarro<sup>3,4\*</sup>, Oriana Marques<sup>1,2</sup>, Tobias A. Bauer<sup>5</sup>, Ruiyue Qiu<sup>1</sup>, Alberto  
7 Diaz-Jimenez<sup>3,4</sup>, Barbara Helm<sup>6</sup>, Yuanyuan Chen<sup>3</sup>, Stefan Sawall<sup>7</sup>, Richard Sparla<sup>1</sup>, Lu Su<sup>5</sup>, Ursula  
8 Klingmüller<sup>6,8,9</sup>, Matthias Barz<sup>5,10</sup>, Matthias W. Hentze<sup>11\*</sup>, Rocío Sotillo<sup>3,8,9\*#</sup>, Martina U.  
9 Muckenthaler<sup>1,2,8,9,12\*#</sup>

10

11 1. Department of Pediatric Hematology, Oncology, Immunology and Pulmonology,  
12 Heidelberg University Hospital, Im Neuenheimer Feld 350, 69120, Heidelberg, Germany.  
13 Martina.Muckenthaler@med.uni-heidelberg.de

14 2. Molecular Medicine Partnership Unit (MMPU), Otto-Meyerhof-Zentrum, Im  
15 Neuenheimer Feld 350, 69120, Heidelberg, Germany.

16 3. Division of Molecular Thoracic Oncology, German Cancer Research Center (DKFZ), Im  
17 Neuenheimer Feld 280, 69120 Heidelberg, Germany. r.sotillo@dkfz-heidelberg.de

18 4. Ruprecht Karl University of Heidelberg, 69120, Heidelberg, Germany.

19 5. Leiden Academic Centre for Drug Research (LACDR), Leiden University, Einsteinweg 55,  
20 2333CC, Leiden, The Netherlands.

21 6. Division of Systems Biology of Signal Transduction, German Cancer Research Center  
22 (DKFZ), Im Neuenheimer Feld 280, 69120, Heidelberg, Germany.

23 7. X-Ray Imaging and CT, German Cancer Research Center (DKFZ), Im Neuenheimer Feld  
24 280, 69120, Heidelberg, Germany.

25 8. German Center for Lung Research (DZL) and Translational Lung Research Center  
26 Heidelberg (TRLIC), 69120, Heidelberg, Germany.

27 9. German Consortium for Translational Cancer Research (DKTK), 69120, Heidelberg,  
28 Germany.

29 10. Department of Dermatology, University Medical Center of the Johannes Gutenberg  
30 University Mainz, Langenbeckstraße 1, 55131, Mainz, Germany.

31       <sup>11.</sup> European Molecular Biology Laboratory (EMBL), Meyerhofstr.1, 69117, Heidelberg,  
32           Germany. [hentze@embl.org](mailto:hentze@embl.org)

33       <sup>12.</sup> German Centre for Cardiovascular Research (DZHK), Partner Site, 69120,  
34           Heidelberg/Mannheim, Germany.

35

36   \* These authors contributed equally

37   # Co-corresponding authors

# Supplemental figure 1

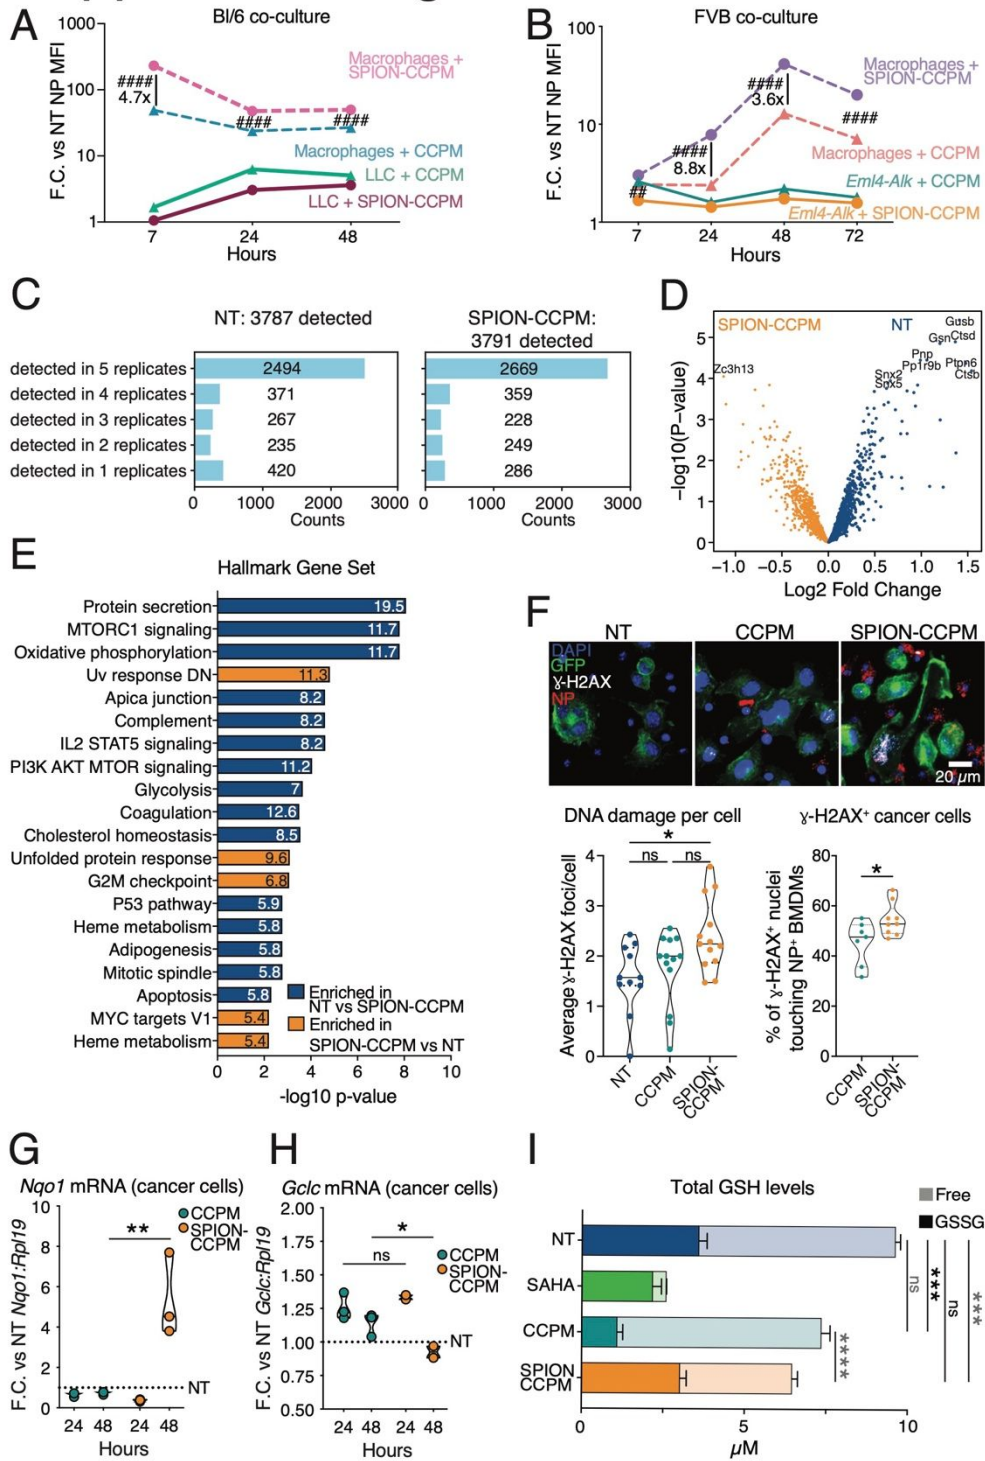

40 *Supplemental Figure 1: SPION-CCPM-accumulation in macrophages induces oxidative stress in cancer cells*

41 Flow cytometry measurement of nanoparticle (NP) signal intensity in Bl/6 (A) and FVB (B) co-

42 cultured bone marrow-derived macrophages (BMDMs) with LLC (A) or *Em14-Alk* (B) cancer cells

43 following SPION-CCPM, CCPM or without treatment (NT); # SPION-CCPM vs CCPM. (C) Bar

44 diagrams showing how often proteins were quantified, based on LFQ intensities, in the samples

45 belonging to each group. (D) Volcano plot displaying the differentially regulated proteins between

46 NT and SPION-CCPM-treated *Em14-Alk* cells. (E) Hallmark Gene Sets of the proteome enriched in

47 NT or SPION-CCPM *Em14-Alk* cells co-cultured with BMDMs with indicated enrichment score.

48 (F)  $\gamma$ -H2AX immunofluorescence microscopy with average foci per positive nuclei (below, left) and

49 percent nanoparticle (NP) positive BMDMs touching  $\gamma$ -H2AX<sup>+</sup> cancer nuclei quantification (below,

50 right) from 2000 cells from 3 mice after 24 h of culturing. Cancer cells were endogenously labeled

51 with GFP. mRNA expression of *Nqo1* (G) and *Gclc* (H) transcripts in co-cultured LLC cancer cells.

52 (I) Total glutathione (GSH) levels in co-cultured *Em14-Alk* cancer cells after 48 h treatment (NT-

53 negative control; SAHA-positive control; CCPM; SPION-CCPM). \* $p < 0.05$ , \*\* $p < 0.005$ , \*\*\* $p < 0.0005$ ,

54 \*\*\*\* $p < 0.0001$ . Two-way ANOVA. Data represented as fold change (F.C.) vs. the non-treated

55 condition (NT) unless otherwise indicated. For all,  $n = 3$ .

# Supplemental figure 2

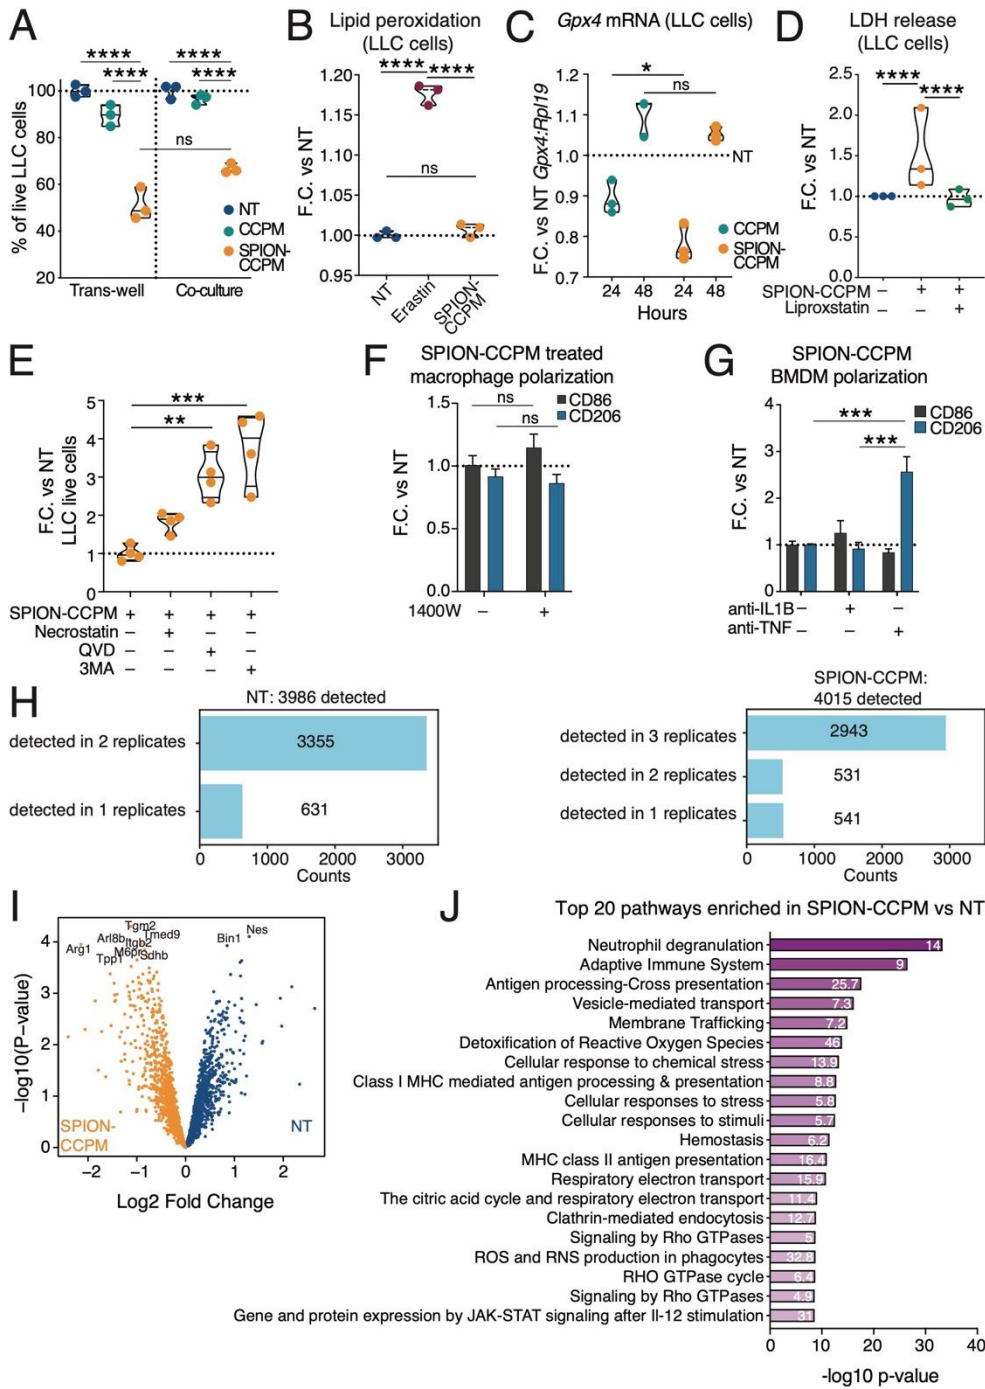

57 Supplemental Figure 2: Secreted factors from SPION-CCPM-loaded macrophages induce cancer cell death

58 (A) Viability of LLC cells following trans-well or co-culture (direct contact) with BMDMs and  
59 treatment with SPION-CCPMs, CCPMs or no treatment (NT) for 48 h. (B) Analysis of lipid  
60 peroxidation in co-cultured cancer cells treated with erastin, SPION-CCPMs, or no treatment (NT)  
61 after 24 h. (C) *Gpx4* mRNA levels in co-cultured LLC cells after treatment with SPION-CCPMs,  
62 CCPMS or NT. (D) Analysis of LDH levels in LLC cells co-cultured with BMDMs and treated with  
63 or without SPION-CCPMs or Liproxstatin for 48 h. (E) Quantification of live co-cultured LLC cells  
64 following treatment with SPION-CCPMs, Necrostatin, QVD or 3-methyl adenine (3MA) after 24  
65 h. (F) Levels of CD86 and CD206 in SPION-CCPM-BMDMs after 48 h of treatment with 1400W.  
66 (G) Analyses of macrophage cell surface markers following SPION-CCPM treatment and inhibition  
67 of IL-1 $\beta$  or TNF for 72 h. Fold change (F.C.) vs SPION-CCPM treatment alone. (H) Bar diagrams  
68 showing how often proteins were quantified, based on LFQ intensities, in the samples belonging to  
69 each group. (I) Volcano plot displaying the differentially regulated proteins between NT and  
70 SPION-CCPM macrophages. (J) Top 20 Reactome pathways enriched in SPION-CCPM-treated vs  
71 non-treated (NT) BMDMs co-cultured with *Em14-Aik* cells and identified by proteomic analysis.  
72 The enrichment scores are indicated. \* $p < 0.05$ , \*\* $p < 0.005$ , \*\*\* $p < 0.0005$ , \*\*\*\* $p < 0.0001$  Two-way  
73 ANOVA. Data represented as F.C. vs the non-treated condition (NT) unless otherwise indicated.  $n$   
74 = 3 per group. A, B, D, E) Samples measured by flow cytometry.  
75

## Supplemental figure 3

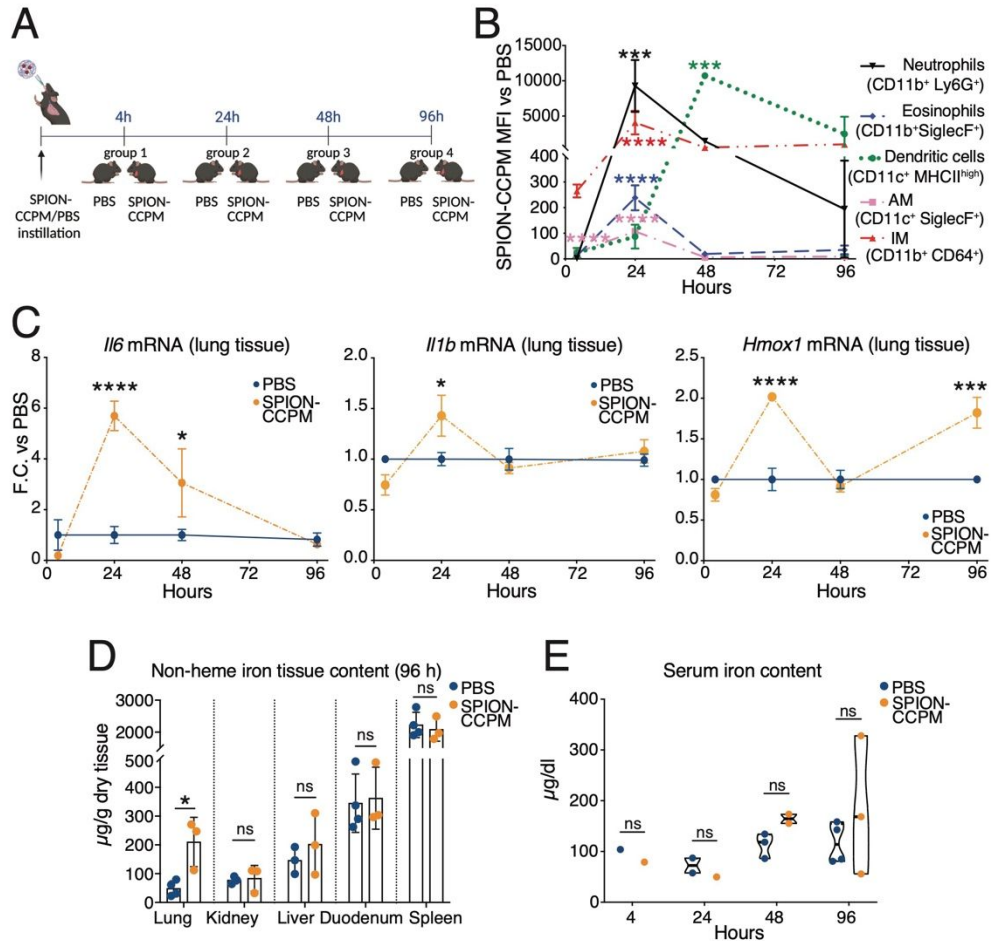

77 Supplemental Figure 3: SPION-CCPMs accumulate in various innate immune cell types and induce  
 78 inflammation in WT mice

79 (A) Experimental design. (B) SPION-CCPM signal intensity measured by flow cytometry in innate  
 80 immune cells of the bronchoalveolar lavage (BAL) for the indicated times. (C) mRNA expression  
 81 analysis of *Il6*, *Il1b* and *Hmox1* genes in lung tissue. Data represented as fold change (F.C.) vs PBS  
 82 mice. (D) Non-heme iron content in the specified organs at 96 h. (E) Serum iron content at 4, 24,  
 83 48 h (PBS n=3; SPION-CCPM n=2); 96 h (PBS n=4; SPION-CCPM n=3). \* $p < 0.05$ , \*\*\* $p < 0.0005$ ,  
 84 Unpaired t-test (D) or Two-way ANOVA (B, C, E). n = 4 mice per group unless specified.

## Supplemental figure 4

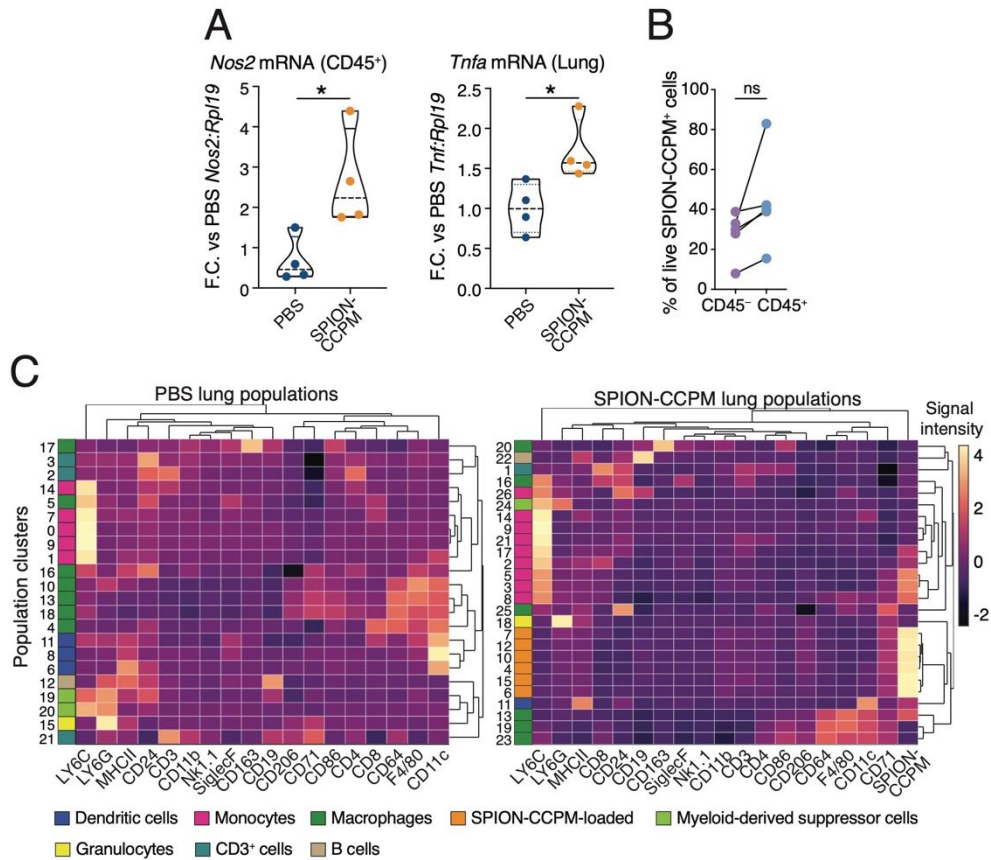

86 *Supplemental Figure 4: Inflammation-induced alterations as a result of SPION-CCPM-treatment in Eml4-*

87 *Alk mice*

88 (A) *Nos2* and *Tnfa* mRNA levels in CD45<sup>+</sup> cells and total lung respectively; F.C. vs PBS mice. (B)

89 Quantification of the frequency of population of SPION-CCPM<sup>+</sup> CD45<sup>-</sup> and CD45<sup>+</sup> lung cells by

90 flow cytometry. (C) Heatmaps analysis of immune cells from lungs of PBS and SPION-CCPM

91 treated mice. Cell surface markers (x-axis) measured by flow cytometry and clustered according to

92 population likeness using the Phenograph algorithm (FlowJo), represented by population clusters

93 (y-axis) and scaled by row. \**p*<0.05, Unpaired t-test (A, B).



| Gene                          | Sequence                                 |
|-------------------------------|------------------------------------------|
| <i>Gclc</i>                   | Forward 5' AGATGATAGAACACGGGAGGAG 3'     |
|                               | Reverse 5' TGATCCTAAAGCGATTGTTCTTC 3'    |
| <i>Gpx4</i>                   | Forward 5' CGCTCCATGCACGAATTCTC 3'       |
|                               | Reverse 5' GCACACGAAACCCCTGTACT 3'       |
| <i>Hmox1</i>                  | Forward 5' AGGCTAAGACCGCCTTCCT 3'        |
|                               | Reverse 5' TGTGTTCTCTGTTCAGCATCA 3'      |
| <i>Il-1<math>\beta</math></i> | Forward 5' TCCGTGCAGACATTGTGGAG 3'       |
|                               | Reverse 5' CTGCTTCTCAAAGTCAGGGTTG 3'     |
| <i>Il-6</i>                   | Forward 5' GCTACCAAACCTGGATATAATCAGGA 3' |
|                               | Reverse 5' CCAGGTAGCTATGGTACTCCAGAA 3'   |
| <i>Nos2</i>                   | Forward 5' TGGAGACTGTCCCAGCAATG 3'       |
|                               | Reverse 5' CAAGGCCAAACACAGCATAACC 3'     |
| <i>Nqo1</i>                   | Forward 5' AGCGTTCGGTATTACGATCC 3'       |
|                               | Reverse 5' AGTACAATCAGGGCTCTTCTCG 3'     |
| <i>Rpl19</i>                  | Forward 5' AGGCATATGGGCATAGGGAAGAG 3'    |
|                               | Reverse 5' TTGACCTTCAGGTACAGGCTGTG 3'    |
| <i>Tnfa</i>                   | Forward 5' TGCCTATGTCTCAGCCTCTTC 3'      |
|                               | Reverse 5' GAGGCCATTTGGGAACTTCT 3'       |

| Antibody | Fluorophore         | Clone       | Isotype             | Manufacturer      |
|----------|---------------------|-------------|---------------------|-------------------|
| CD11b    | PerCP               | ICRF44      | N/A                 | ThermoFisher      |
| CD11c    | PE                  | N418        | N/A                 | BioLegend         |
| CD11c    | Brillant Violet 650 | 117339      | NA                  | Biolegend         |
| CD163    | Pe-Cy7              | 25-1631-82  | NA                  | Life Technologies |
| CD19     | PE                  | 115508      | NA                  | Biolegend         |
| CD206    | Alexa Fluor 700     | MR6F3       | Rat IgG2b, $\kappa$ | ThermoFisher      |
| CD206    | FITC                | 141704      | NA                  | Biolegend         |
| CD24     | Super Bright 436    | 62-0242-80  | NA                  | Life Technologies |
| CD3      | Alexa Fluor 700     | 100215      | NA                  | Biolegend         |
| CD326    | Alexa Fluor 594     | 118222      | NA                  | Biolegend         |
| CD4      | Brillant Violet 570 | 100541      | NA                  | Biolegend         |
| CD45     | PerCP-Cy5.5         | 104         | N/A                 | ThermoFisher      |
| CD64     | Brillant Violet 711 | X54-5/7.1   | N/A                 | BioLegend         |
| CD71     | Brillant Violet 510 | RI7217      | Rat IgG2a, $\kappa$ | BioLegend         |
| CD8      | Pe-Cy5.5            | SBA-1550-16 | NA                  | Biozol            |
| CD86     | Brillant Violet 421 | GL-1        | Rat IgG2a, $\kappa$ | BioLegend         |
| CD86     | Brillant Violet 785 | 105043      | NA                  | Biolegend         |
| F4/80    | Brillant Violet 605 | T45-2342    | N/A                 | ThermoFisher      |
| Ly6C     | PE-Dazzle           | HK1.4       | N/A                 | BioLegend         |
| Ly6G     | FITC                | 1A8         | N/A                 | BioLegend         |
| Ly6G     | Brillant Violet 605 | 127639      | NA                  | Biolegend         |
| MerTK    | Brillant Violet 421 | 108928      | Rat IgG2a           | ThermoFisher      |
| MHC II   | Pe-Cy7              | M5/114.15.2 | Rat IgG2b, $\kappa$ | Biolegend         |
| MHC II   | Alexa Fluor 532     | 58-5321-82  | NA                  | Life Technologies |
| Nk1.1    | APC-Fire 810        | 156519      | NA                  | Biolegend         |
| Siglec-F | APC-Cy7             | E50-2440    | N/A                 | ThermoFisher      |
